# Supplementary material for: Effect of Dickkopf-1 (Dkk-1) and SP600125, a JNK Inhibitor, on Wnt Signaling in Canine Prostate Cancer Growth and Bone Metastases
Source: MDPI journal article supplement (doi:10.3390/vetsci8080153), 2021-08-01
Supplement: s1 [file s1]

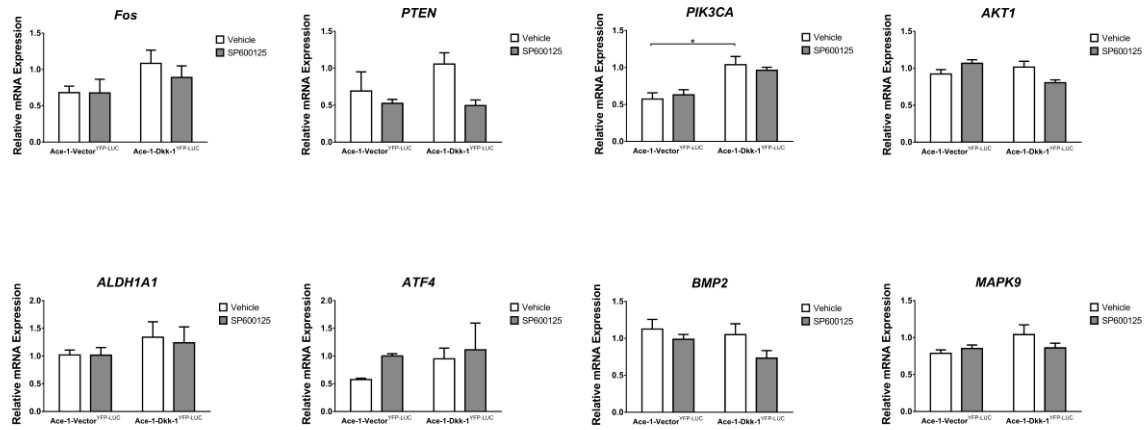

**Figure S1:** Relative *in vivo* mRNA expression of *FOS*, *PTEN*, *PIK3CA*, *AKT1*, *ALDH1A1*, *ATF4*, *BMP2* and *MAPK9* normalized to normalized to *GAPDH* in Ace-1-Vector<sup>YFP-LUC</sup> and Ace-1-Dkk-1<sup>YFP-LUC</sup> xenografts with either vehicle or SP600125 (5 mg/Kg). Significant differences between different groups are indicated with asterisks.

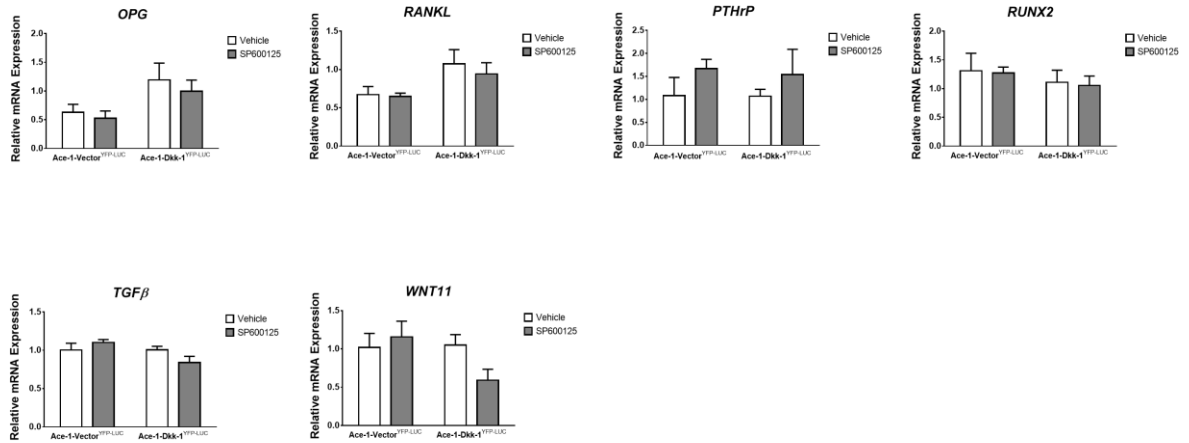

**Figure S2:** Relative *in vivo* mRNA expression of *OPG*, *RANKL*, *PTHrP*, *RUNX2*, *TGFβ*, and *WNT11* normalized to normalized to *GAPDH* in Ace-1-Vector<sup>YFP-LUC</sup> and Ace-1-Dkk-1<sup>YFP-LUC</sup> xenografts with either vehicle or SP600125 (5 mg/Kg). Significant differences between different groups are indicated with asterisks.
